# Supplementary material for: Position-locking of volatile reaction products by atmosphere and capping layers slows down photodecomposition of methylammonium lead triiodide perovskite
Source: Royal Society of Chemistry journal article supplement (doi:10.1039/d0ra03572f), 2020-01-01
Supplement: d0ra03572f1.pdf [file d0ra03572f1.pdf]

## Supporting Information for

### Position-locking of volatile reaction products by atmosphere and capping layers slows down photodecomposition of methylammonium lead triiodide perovskite

Fengshuo Zu,<sup>a</sup> Thorsten Schultz,<sup>a</sup> Christian M. Wolff,<sup>b</sup> Dongguen Shin,<sup>a</sup> Lennart Frohloff,<sup>a</sup> Dieter Neher,<sup>b</sup> Patrick Amsalem,<sup>a</sup> and Norbert Koch<sup>\*a,c</sup>

<sup>a</sup>Institut für Physik & IRIS Adlershof, Humboldt-Universität zu Berlin, 12489 Berlin, Germany

<sup>b</sup>Institut für Physik und Astronomie, Universität Potsdam, 14776 Potsdam, Germany

<sup>c</sup>Helmholtz-Zentrum Berlin für Materialien und Energie GmbH, 12489 Berlin, Germany

The wide range X-ray diffraction (XRD) measurements of a  $\text{PbI}_2$  film and the pristine PEDOT:PSS/ $\text{MAPbI}_3$  perovskite films before and after illumination treatments in different environmental conditions are shown in Fig S1. The XRD peaks appeared at  $14.2^\circ$ ,  $20.1^\circ$ ,  $23.6^\circ$ ,  $24.6^\circ$  and  $28.5^\circ$  correspond to the (110), (200), (211), (202) and (220) planes of the perovskite tetragonal structure, according the PDF card [PDF 01-084-7607 (ICDD, 2018)]. Peak at  $12.7^\circ$  is assigned to be the (001) plane of the  $\text{PbI}_2$  hexagonal structure [PDF 00-007-0235 (ICDD, 1957)].

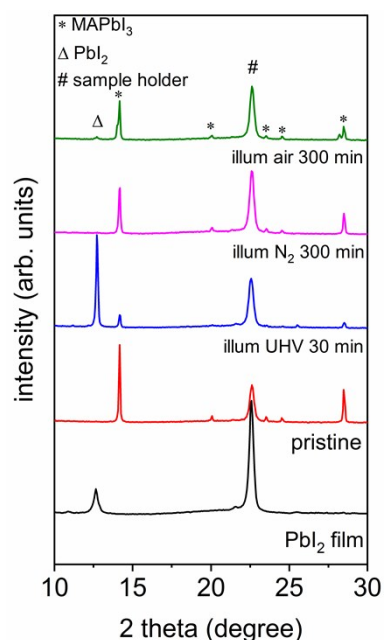

Fig S1. X-ray diffraction patterns of a  $\text{PbI}_2$  film, and the pristine  $\text{MAPbI}_3$  perovskite films before and after illumination treatment in different environmental conditions. Symbol “ $\Delta$ ” and “\*” corresponds the peak positions of  $\text{PbI}_2$  and  $\text{MAPbI}_3$ , respectively.  $\text{PbI}_2$  (001) peak position accords to PDF 00-007-0235 (ICDD, 1957) and  $\text{MAPbI}_3$  peaks to PDF 01-084-7607 (ICDD, 2018).

X-ray photoelectron spectroscopy (XPS) spectra of the PEDOT:PSS/MAPbI<sub>3</sub> films before and after illumination treatments in UHV, N<sub>2</sub> and ambient air conditions are shown in Fig S2, Fig S3 and Fig S4, respectively. We note that in all cases, C 1s spectra consist of two peaks at 285.8 eV (C<sub>H</sub>) and 284.4 eV (C<sub>L</sub>) for all pristine perovskite samples with C<sub>H</sub> being much higher than C<sub>L</sub> in intensity. Here, the C<sub>H</sub> peak is assigned to be the CH<sub>3</sub>NH<sub>3</sub><sup>+</sup> from perovskite structure, and the C<sub>L</sub> is possibly due to the presence of CH<sub>3</sub>NH<sub>2</sub>, according to previous reports.<sup>1,2</sup> Therefore, quantitative analyses of the stoichiometry upon illumination treatments were conducted using the C 1s (peaks of C<sub>H</sub>), N 1s, Pb 4f 7/2 and I 3d5/2 peaks, as displayed in Fig 1c.

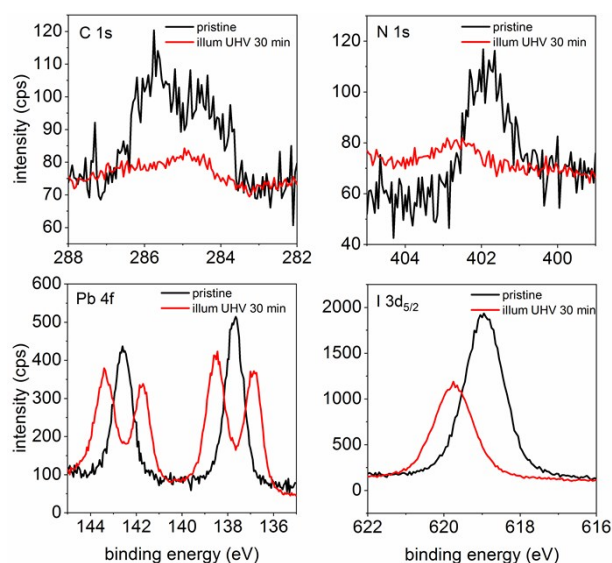

Fig S2. XPS core levels spectra of C 1s, N 1s, Pb 4f and I 3d<sub>5/2</sub> of the PEDOT:PSS/MAPbI<sub>3</sub> films before (black line) and after illumination treatment (red line) in UHV condition for 30 min. Spectra were recorded at JPS-9030 UHV system.

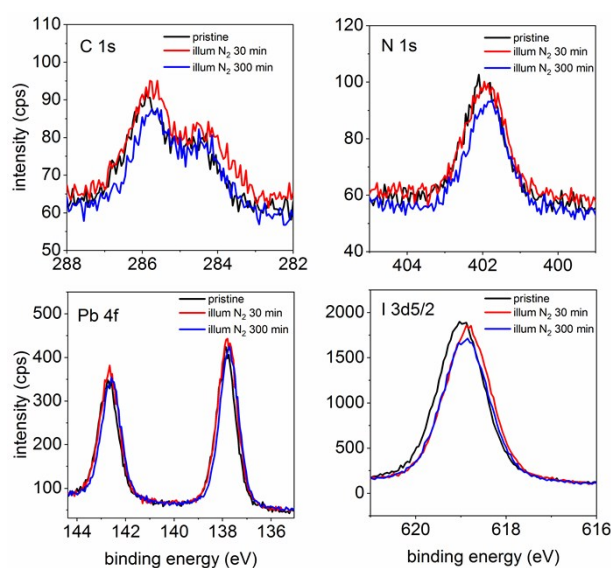

Fig S3. XPS core levels spectra of C 1s, N 1s, Pb 4f and I 3d<sub>5/2</sub> of the PEDOT:PSS/MAPbI<sub>3</sub> films before (black line) and after illumination treatment in N<sub>2</sub> condition for 30 min (red line) and 300 min (blue line), respectively. Spectra were recorded at JPS-9030 UHV system.

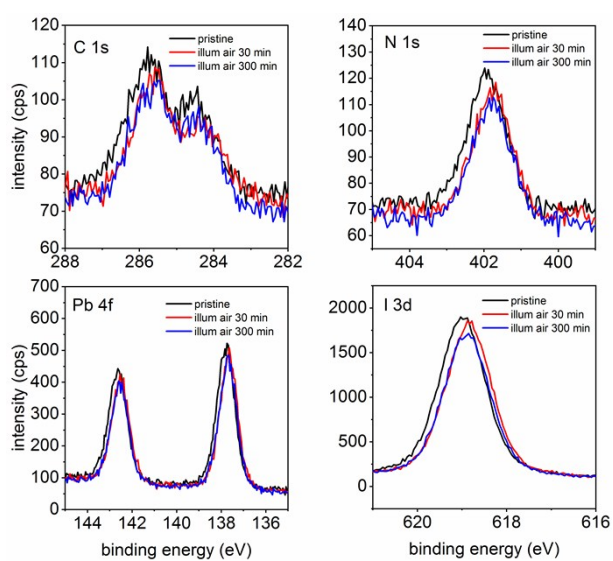

Fig S4. XPS core levels spectra of C 1s, N 1s, Pb 4f and I 3d<sub>5/2</sub> of the PEDOT:PSS/MAPbI<sub>3</sub> films before (black line) and after illumination treatment in ambient air condition for 30 min (red line) and 300 min (blue line), respectively. Spectra were recorded at JPS-9030 UHV system.

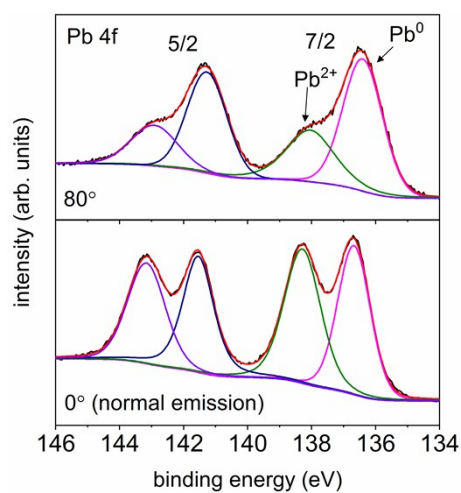

Fig S5. Angle-dependent XPS spectra of the Pb 4f core levels of the PEDOT:PSS/ MAPbI<sub>3</sub> films after illumination treatment in UHV condition for 30 min.

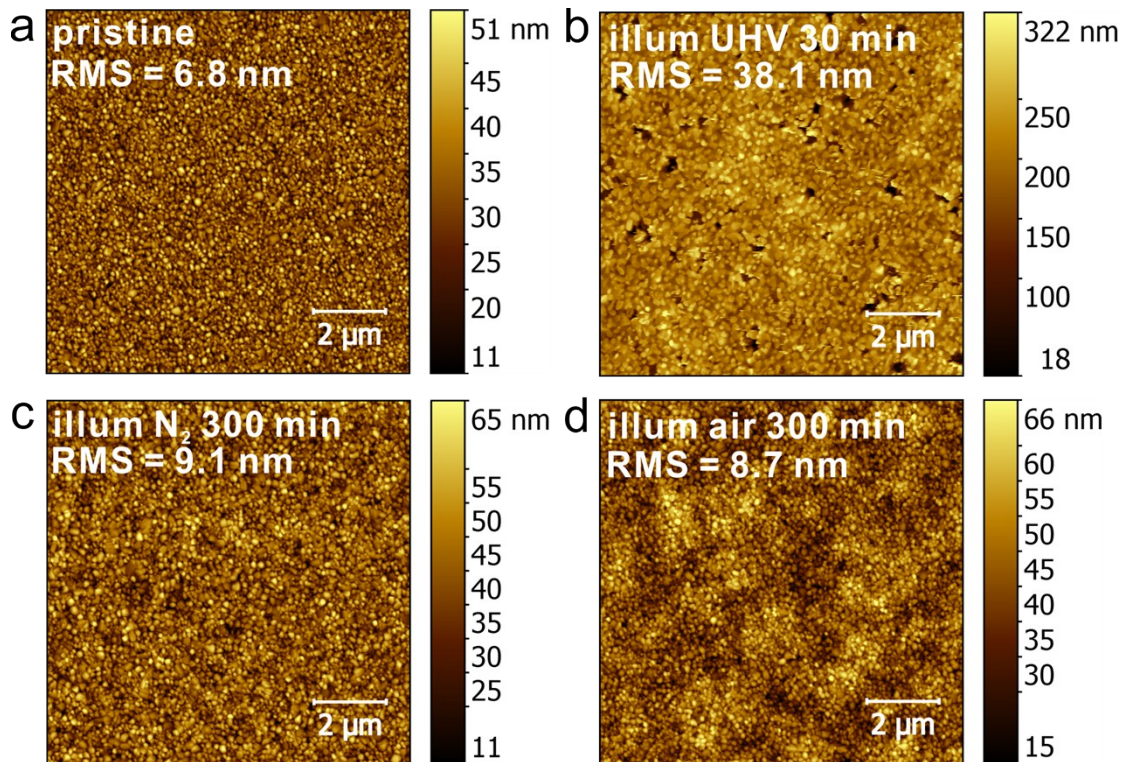

Fig S6. AFM morphology of the (a) pristine PEDOT:PSS/ MAPbI<sub>3</sub> films and after illumination treatments in (b) UHV for 30 min, (c) N<sub>2</sub> and (d) ambient air for 300 min.

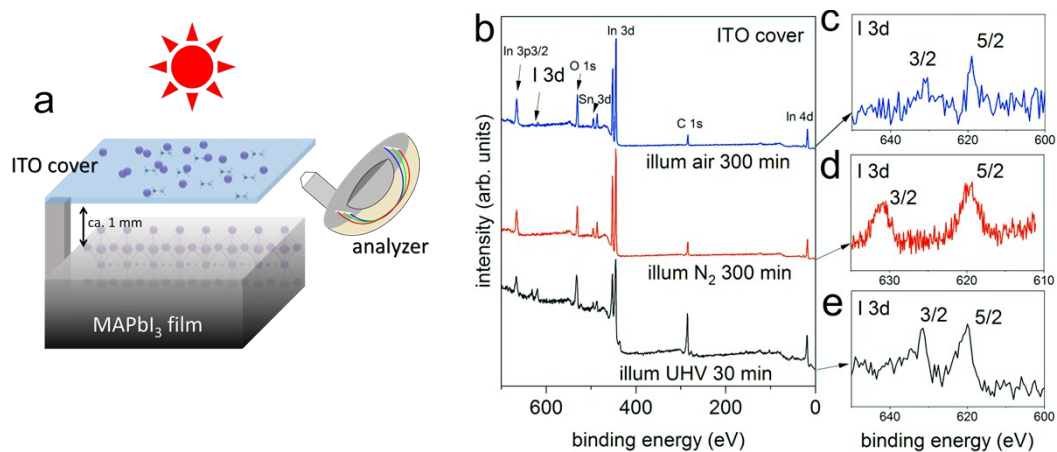

Fig S7. (a) Schematic illustration of ITO covers mounted on top of the perovskite films during illumination process. (b) XPS survey spectra of the ITO covers as illustrated in (a) during illumination treatments in UHV, N<sub>2</sub> and ambient air conditions. (c), (d) and (e) are the magnified spectra of the corresponding ITO covers in UHV, N<sub>2</sub> and air, respectively, in the energy region of iodine.

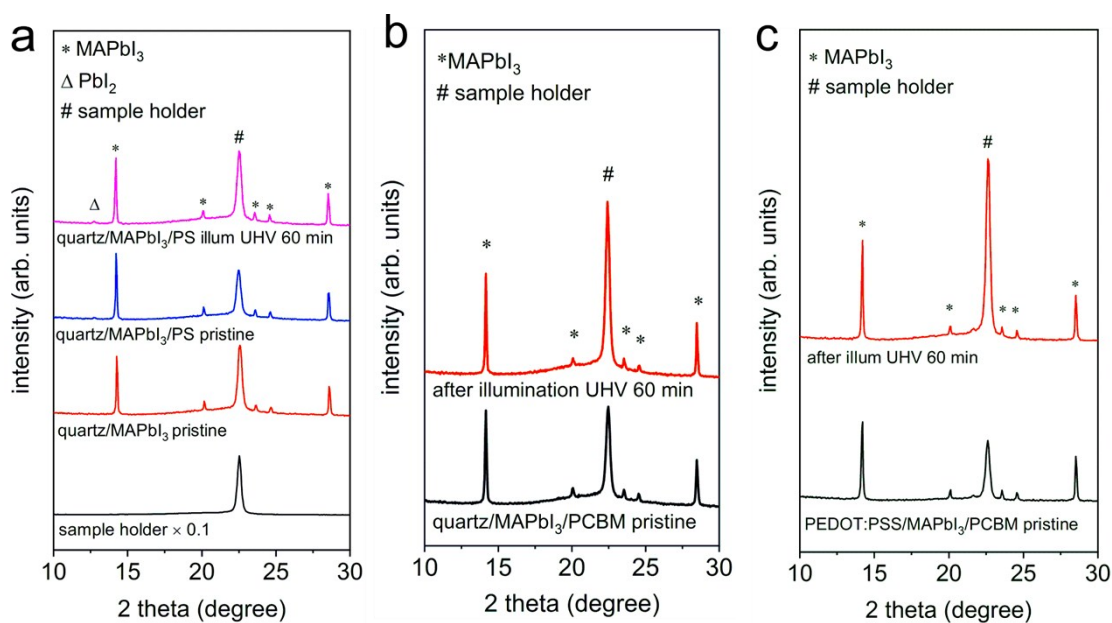

Fig S8. X-ray diffraction patterns of (a) a reference sample holder, the pristine quartz/MAPbI<sub>3</sub>/PS films, (b) the pristine quartz/MAPbI<sub>3</sub>/PCBM films and (c) the pristine PEDOT:PSS/MAPbI<sub>3</sub>/PCBM films before and after illumination treatment in UHV condition for 60min. Symbol “ $\Delta$ ” and “\*” corresponds the peak positions of PbI<sub>2</sub>

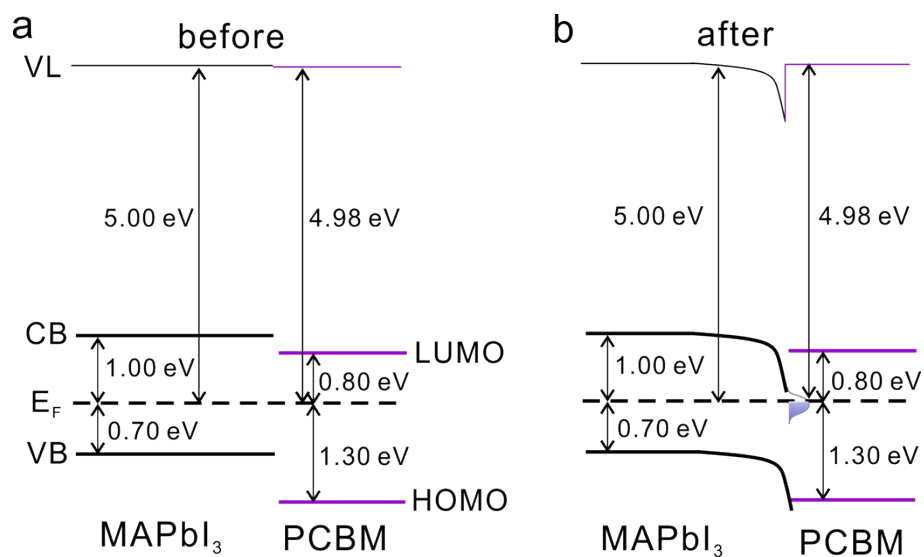

and MAPbI<sub>3</sub>, respectively. “#” refers to the peak of the sample holder.

Fig S9. The energy level diagrams at the MAPbI<sub>3</sub>/PCBM interface before and after illumination treatment in UHV condition for 60 min. Electronic bandgaps of 1.70 eV for MAPbI<sub>3</sub><sup>3</sup> and of 2.1 eV for PCBM<sup>4</sup> are assumed according

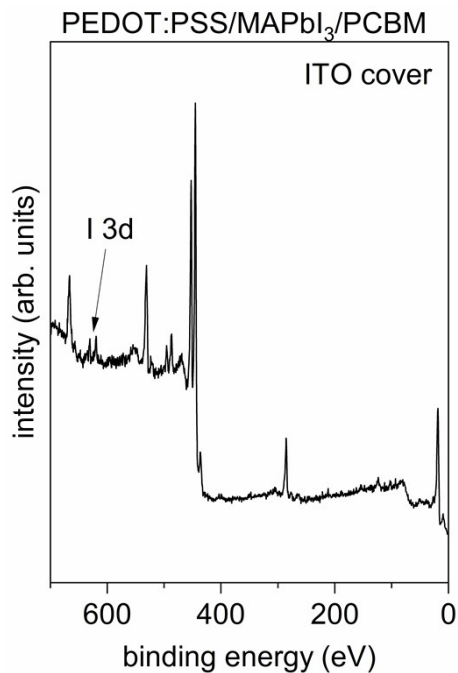

to previous reports. CB, VB and VL denote conduction bands, valence bands and vacuum level, respectively. LUMO and HOMO stand for lowest unoccupied and highest occupied molecular orbitals, respectively.  $E_F$  refers to Fermi level at 0 binding energy.

Fig S10. XPS survey spectrum of the ITO cover mounted on top of the PEDOT:PSS/MAPbI<sub>3</sub>/PCBM film during light exposure in UHV condition. Iodine 3d peaks are indicated.

XRD patterns of the MAPbI<sub>3</sub> perovskite films prepared at the MAI/PbI<sub>2</sub> molar ratios of 1:1 and 1:0.95 are shown in Fig. S11. Clearly, the perovskite sample using the 1:1 ratio exhibits noticeable PbI<sub>2</sub> species in the film, as illustrated by the PbI<sub>2</sub> (001) peak at 12.7°. In comparison, by reducing the PbI<sub>2</sub> content by 0.05 percent, the formation of PbI<sub>2</sub> can be prevented.

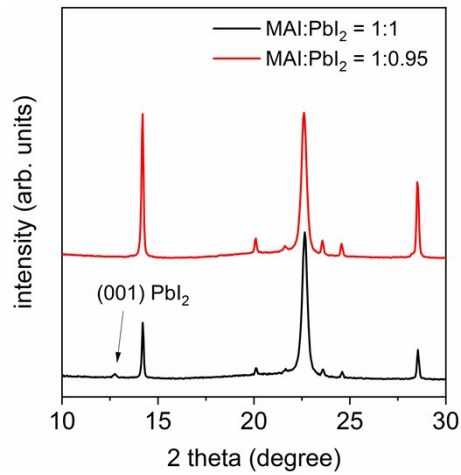

Fig. S11 XRD patterns of the MAPbI<sub>3</sub> perovskite films prepared at the MAI/PbI<sub>2</sub> molar ratios of 1:1 and 1:0.95.

### References

- [1] S. Wang, Y. Jiang, Emilio J. Juarez-Perez, Luis K. Ono, and Y. Qi, "Accelerated degradation of methylammonium lead iodide perovskites induced by exposure to iodine vapour", *Nature Energy* **2** (2016).
- [2] M.-C. Jung, Y. M. Lee, H.-K. Lee, J. Park, S. R. Raga, L. K. Ono, S. Wang, M. R. Leyden, B. D. Yu, S. Hong, and Y. Qi, "The presence of CH<sub>3</sub>NH<sub>2</sub> neutral species in organometal halide perovskite films", *Applied Physics Letters* **108**, 073901 (2016).
- [3] P. Schulz, E. Edri, S. Kirmayer, G. Hodes, D. Cahen, and A. Kahn, "Interface energetics in organometal halide perovskite-based photovoltaic cells", *Energy & Environmental Science* **7**, 1377 (2014).
- [4] K. Akaike, K. Kanai, H. Yoshida, J. y. Tsutsumi, T. Nishi, N. Sato, Y. Ouchi, and K. Seki, "Ultraviolet photoelectron spectroscopy and inverse photoemission spectroscopy of [6,6]-phenyl-C61-butyric acid methyl ester in gas and solid phases", *Journal of Applied Physics* **104**, 023710 (2008).
